# Supplementary material for: Treatment with novel topoisomerase inhibitors in Ewing sarcoma models reveals heterogeneity of tumor response
Source: Frontiers journal article supplement (doi:10.3389/fcell.2024.1462840), 2024-10-24
Supplement: Image_4.pdf [file Image_4.pdf]

Supplemental Figure S4

EW8 24H

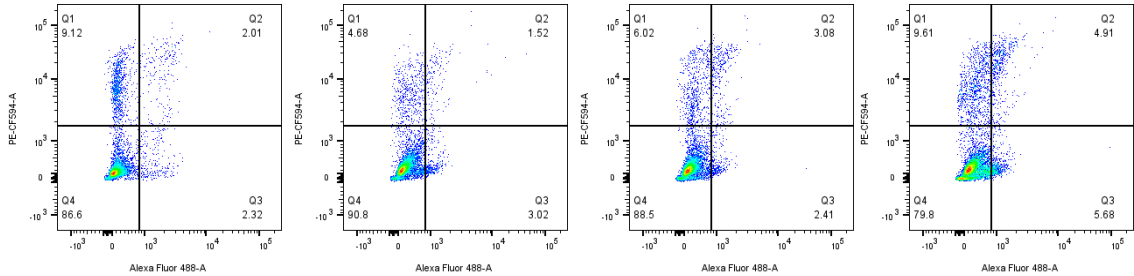

48H

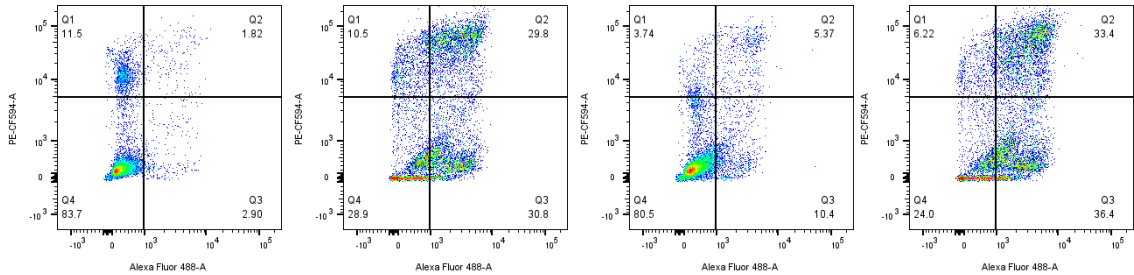

72H

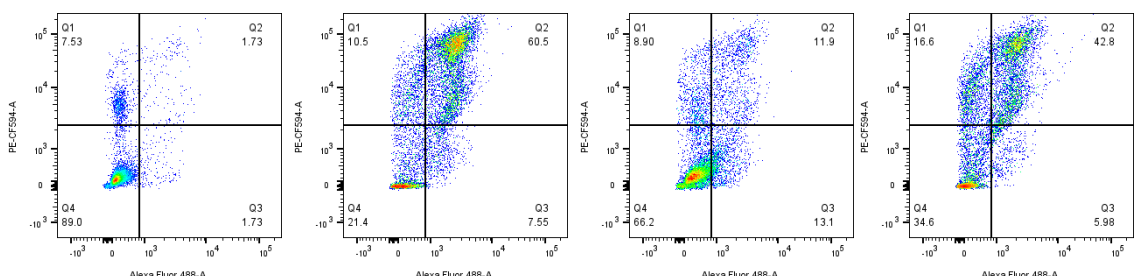

DMSO LMP400 LMP744 LMP776

ES4 24H

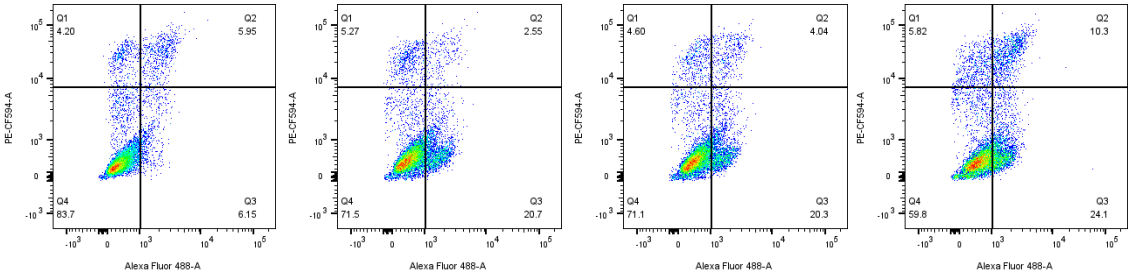

48H

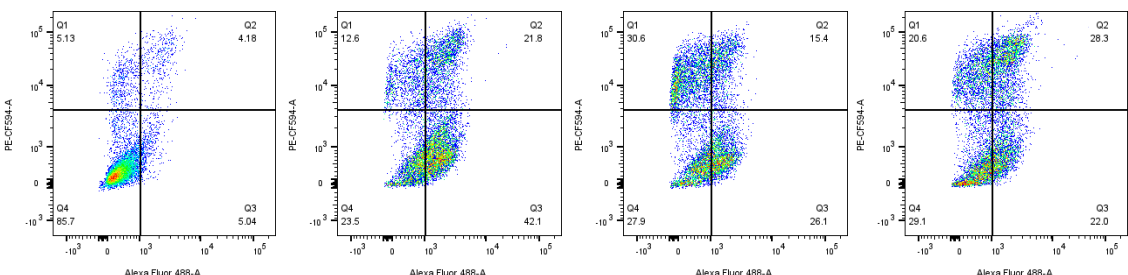

72H

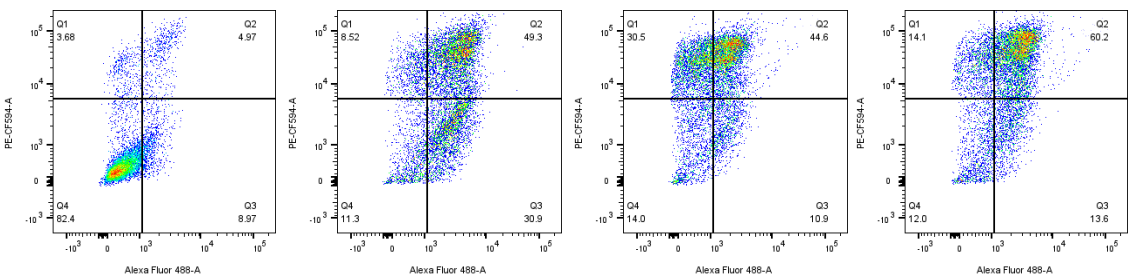

DMSO LMP400 LMP744 LMP776

**Supplemental Figure S4. IIQ treatments demonstrate time-dependent accumulation of early and late apoptotic populations in EWS cell lines.** Representative flow plots as analyzed by FlowJo showing the shift towards early (Q3) and late (Q2) apoptosis of EW8 and ES4 cell lines treated for 24, 48, and 72 hours with DMSO, LMP400 (40 nM), LMP744 (80 nM for EW8 and 40 nM for ES4), or LMP776 (40 nM).
