# Supplementary material for: Treatment with novel topoisomerase inhibitors in Ewing sarcoma models reveals heterogeneity of tumor response
Source: Frontiers journal article supplement (doi:10.3389/fcell.2024.1462840), 2024-10-24
Supplement: Image_5.pdf [file Image_5.pdf]

## Supplemental Figure S5

**A**

**Tolerability Study:  
5-day-on/2-day-off/5-day-on Schedule**

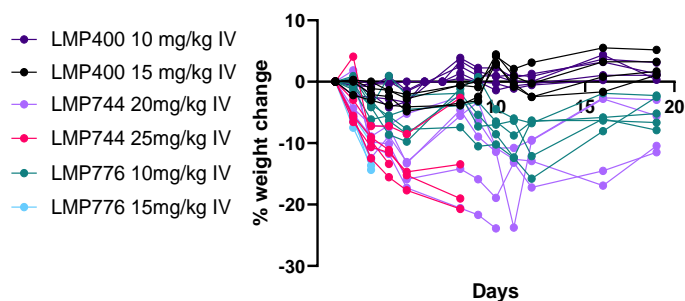

**B**

**Tolerability Study:  
5-day-on/9-day-off/5-day-on Schedule**

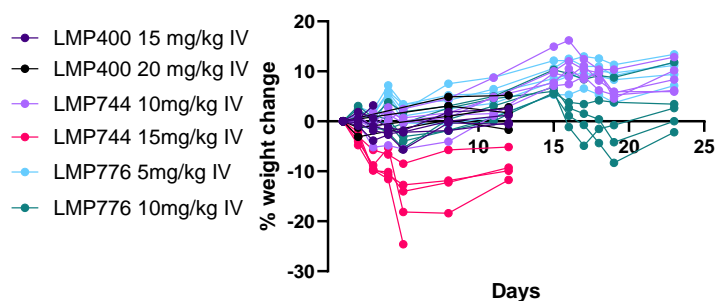

**Supplemental Figure S5. Effect of IIQs on animal weights. A.** Spider plot showing percent weight change in each mouse in a tolerability study testing IIQs administered by IV tail injection in a 5-day-on/2-day-off/5-day-on dosing schedule. Besides dramatic weight loss observed with higher doses of LMP744 and systemic toxicity with higher dose of LMP776, tail irritation was observed in majority of groups. **B.** Spider plot showing percent weight change in each mouse in a tolerability study testing IIQs administered by IV tail injection in a 5-day-on/9-day-off/5-day-on dosing schedule. Higher doses (>10mg/kg) of LMP400 and LMP744 resulted in systemic toxicity.
