# Supplementary material for: Treatment with novel topoisomerase inhibitors in Ewing sarcoma models reveals heterogeneity of tumor response
Source: Front Cell Dev Biol. 2024 Oct 24;12:1462840. doi: 10.3389/fcell.2024.1462840 (PMC11542432; doi:10.3389/fcell.2024.1462840)
Supplement: Supplementary file 15 [file DataSheet2.xlsx]

## Sheet: EWSR1_FL1.fusion.read.count
Sample	Number of paired reads
NCI21_1	14
NCI21_2	13
NCI21_3	43
NCI21R_1	17
NCI21R_2	29
NCI21R_3	22
OH1_1	85
OH1_2	57
OH1_3	108
OH4_1	20
OH4_2	18
OH4_3	51
SJ17_1	1
SJ17_2	7
SJ17_3	24
SJ18_1	16
SJ18_2	162
SJ18_3	129
SJ49_1	88
SJ49_2	26
SJ49_3	90

## Sheet: TP53 STAG2 reads
Mutation information																				Alternate/Reference reads
Chr	Start	End	Ref	Alt	Func.refGene	Gene.refGene	ExonicFunc.refGene	AAChange.refGene	ExAC_ALL	avsnp142	SIFT_score	SIFT_pred	Polyphen2_HDIV_score	Polyphen2_HDIV_pred	Polyphen2_HVAR_score	Polyphen2_HVAR_pred	deleterious	aachanging	somatic	NCI21_1	NCI21_2	NCI21_3	NCI21R_1	NCI21R_2	NCI21R_3	OH1_1	OH1_2	OH1_3	OH4_1	OH4_2	OH4_3	SJ17_1	SJ17_2	SJ17_3	SJ18_1	SJ18_2	SJ18_3	SJ49_1	SJ49_2	SJ49_3
chr17	7674220	7674220	C	T	exonic	TP53	missense	TP53:NM_001126115:exon3:c.G347A:p.R116Q,TP53:NM_001126116:exon3:c.G347A:p.R116Q,TP53:NM_001126117:exon3:c.G347A:p.R116Q,TP53:NM_001276697:exon3:c.G266A:p.R89Q,TP53:NM_001276698:exon3:c.G266A:p.R89Q,TP53:NM_001276699:exon3:c.G266A:p.R89Q,TP53:NM_001126118:exon6:c.G626A:p.R209Q,TP53:NM_000546:exon7:c.G743A:p.R248Q,TP53:NM_001126112:exon7:c.G743A:p.R248Q,TP53:NM_001126113:exon7:c.G743A:p.R248Q,TP53:…	5.768e-05	rs11540652	0.005	D	1	D	0.996	D	TRUE	TRUE	TRUE	28/28	27/27	53/53	43/43	46/46	24/24	0/0	0/0	0/0	0/0	0/0	0/0	0/0	0/0	0/0	0/0	0/0	0/0	0/0	0/0	0/0
chr17	7676055	7676055	C	A	exonic	TP53	missense	TP53:NM_001126118:exon3:c.G197T:p.G66V,TP53:NM_000546:exon4:c.G314T:p.G105V,TP53:NM_001126112:exon4:c.G314T:p.G105V,TP53:NM_001126113:exon4:c.G314T:p.G105V,TP53:NM_001126114:exon4:c.G314T:p.G105V,TP53:NM_001276695:exon4:c.G197T:p.G66V,TP53:NM_001276696:exon4:c.G197T:p.G66V,TP53:NM_001276760:exon4:c.G197T:p.G66V,TP53:NM_001276761:exon4:c.G197T:p.G66V			0	D	1	D	1	D	TRUE	TRUE	TRUE	0/0	0/0	0/0	0/0	0/0	0/0	0/0	0/0	0/0	0/0	0/0	0/0	30/30	20/20	47/47	0/0	0/0	0/0	0/0	0/0	0/0
chrX	124045347	124045347	C	T	exonic	STAG2	nonsense	STAG2:NM_001375375:exon7:c.C646T:p.R216X,STAG2:NM_006603:exon7:c.C646T:p.R216X,STAG2:NM_001042749:exon8:c.C646T:p.R216X,STAG2:NM_001042750:exon8:c.C646T:p.R216X,STAG2:NM_001042751:exon8:c.C646T:p.R216X,STAG2:NM_001282418:exon8:c.C646T:p.R216X									TRUE	TRUE	TRUE	0/0	0/0	0/0	0/0	0/0	0/0	0/0	0/0	0/0	0/0	0/0	0/0	0/0	0/0	0/0	20/53	23/54	26/46	0/0	0/0	0/0
chrX	124063941	124063941	C	T	exonic	STAG2	missense	STAG2:NM_001375375:exon19:c.C1915T:p.L639F,STAG2:NM_006603:exon19:c.C1915T:p.L639F,STAG2:NM_001042749:exon20:c.C1915T:p.L639F,STAG2:NM_001042750:exon20:c.C1915T:p.L639F,STAG2:NM_001042751:exon20:c.C1915T:p.L639F,STAG2:NM_001282418:exon20:c.C1915T:p.L639F			0.029	D	0.957	D	0.868	P	TRUE	TRUE	TRUE	6/23	4/17	0/0	0/0	6/44	0/0	5/31	0/0	2/25	0/0	0/0	3/21	3/33	6/29	4/44	0/0	0/0	0/0	0/0	4/30	0/0
chrX	124045338	124045339	AG	-	exonic	STAG2	frameshift	STAG2:NM_001375375:exon7:c.637_638del:p.R213Sfs*25,STAG2:NM_006603:exon7:c.637_638del:p.R213Sfs*25,STAG2:NM_001042749:exon8:c.637_638del:p.R213Sfs*25,STAG2:NM_001042750:exon8:c.637_638del:p.R213Sfs*25,STAG2:NM_001042751:exon8:c.637_638del:p.R213Sfs*25,STAG2:NM_001282418:exon8:c.637_638del:p.R213Sfs*25									TRUE	TRUE	TRUE	0/0	0/0	0/0	0/0	0/0	0/0	0/0	0/0	0/0	0/0	0/0	0/0	13/13	17/18	17/17	0/0	0/0	0/0	0/0	0/0	0/0
